# Supplementary figures and images for: High-content screening Raman spectroscopy (HCS-RS) of panitumumab-exposed colorectal cancer cells
Source: Royal Society of Chemistry journal article supplement (doi:10.1039/c9an01176e), 2019-01-01

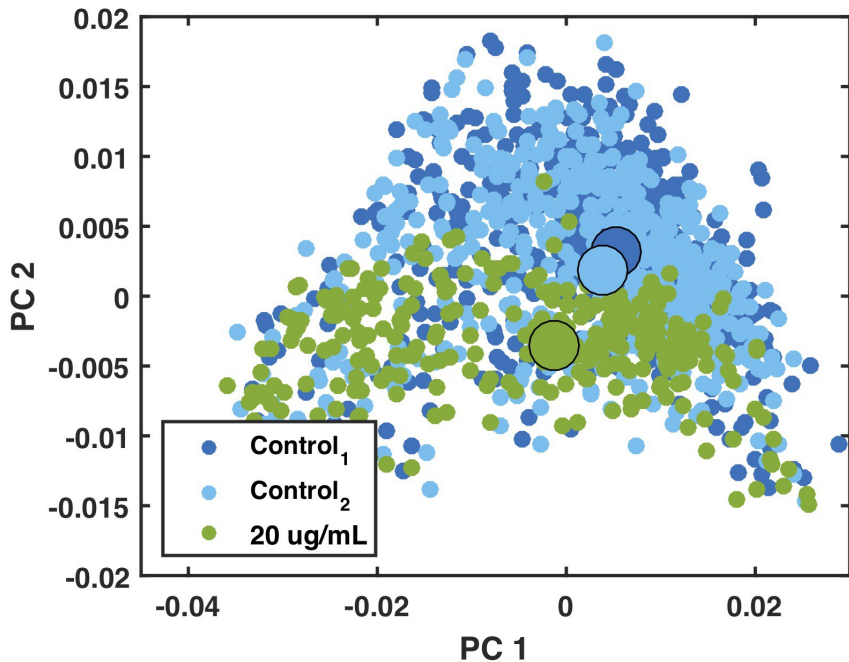

Supplement: c9an01176e3.pdf [file c9an01176e3.pdf]
